# Supplementary material
Source: ML conference proceedings conference paper supplement (https://openreview.net/forum?id=Js5PJPHDyY)
Supplement: supplementary_material [file attachment]

## Supplementary Materials Organization:

---

|          |                                                 |           |
|----------|-------------------------------------------------|-----------|
| <b>A</b> | <b>More Experimental Analysis</b>               | <b>13</b> |
| A.1      | Base-to-new Generalization . . . . .            | 13        |
| A.2      | Robustness to Different Architectures . . . . . | 13        |
| <b>B</b> | <b>Experimental Details</b>                     | <b>13</b> |
| B.1      | Statistic of Datasets . . . . .                 | 13        |
| B.2      | Prompt Templates for Each Dataset . . . . .     | 15        |
| B.3      | Pseudocode . . . . .                            | 15        |

---

## A MORE EXPERIMENTAL ANALYSIS

## A.1 BASE-TO-NEW GENERALIZATION

**Results.** Our method can be extended to the base-to-new generalization scenario by incorporating the KNN algorithm. To accomplish this, we utilize the text embeddings of the new classes to query the training set and select the  $k$  nearest neighbors as the training data for the new class. Subsequently, we apply our proposed method to generate the classifier for the new classes using the synthesized dataset. In order to compare our approach, we select CLIP (Radford et al., 2021), CoOp (Zhou et al., 2022b), and CoCoOp (Zhou et al., 2022a).

Table 8 presents the results, which demonstrate that our approach outperforms the other methods in terms of base accuracy, new accuracy, and their harmonic mean. On average across 11 datasets, our method surpasses CLIP, CoOp, and CoCoOp by 14.62%, 1.27%, and 3.49% in terms of base accuracy. It also outperforms them by 0.31%, 11.31%, and 2.84% in terms of new accuracy, and by 7.02%, 7.06%, and 2.89% in terms of the harmonic mean. Moreover, our approach achieves the highest harmonic mean in 8 out of 11 datasets. These results clearly indicate the effectiveness of our approach in generalizing to new classes.

## A.2 ROBUSTNESS TO DIFFERENT ARCHITECTURES

We further evaluate the efficacy of our proposed method across 11 datasets with varying visual architectures of CLIP. We selected two approaches for comparison: a training-required method, CoOp (Zhou et al., 2022b), and a training-free method, Tip-Adapter (Zhang et al., 2022). And these methods are trained on the 16-shot dataset. As shown in Table 9, our method yielded a substantial improvement of 17.28%, 18.20%, 16.18%, and 16.62% on average, compared to the zero-shot CLIP (Radford et al., 2021) approach, for ResNet-50, ResNet-101, ViT-B/32, and ViT-B/16 CLIP, respectively, across all 11 datasets. The results demonstrate the effectiveness of our method across different CLIP architectures.

## B EXPERIMENTAL DETAILS

## B.1 STATISTIC OF DATASETS

Following previous work (Zhou et al., 2022a;b; Wang et al., 2023c; Huang et al., 2022; Wang et al., 2023a), we conduct experiments on 17 publicly available image classification datasets. The datasets include ImageNet (Deng et al., 2009), Caltech101 (Li et al., 2004), OxfordPets (Parkhi et al., 2012), StanfordCars (Krause et al., 2013), Flowers102 (Nilsback & Zisserman, 2008), Food101 (Bossard et al., 2014), FGVCAircraft (Maji et al., 2013), EuroSAT (Helber et al., 2019), UCF101 (Soomro et al., 2012), DTD (Cimpoi et al., 2014), SUN397 (Xiao et al., 2010), ImageNetV2 (Recht et al.,

| (a) Average over 11 datasets |              |              |              | (b) ImageNet     |              |              |              | (c) Caltech101 |              |              |              |
|------------------------------|--------------|--------------|--------------|------------------|--------------|--------------|--------------|----------------|--------------|--------------|--------------|
|                              | base         | new          | H            |                  | base         | new          | H            |                | base         | new          | H            |
| CLIP                         | 69.34        | 74.22        | 71.70        | CLIP             | 72.43        | 68.14        | 70.22        | CLIP           | 96.84        | 94.00        | 95.40        |
| CoOp                         | 82.69        | 63.22        | 71.66        | CoOp             | <b>76.47</b> | 67.88        | 71.92        | CoOp           | 98.00        | 89.81        | 93.73        |
| CoCoOp                       | 80.47        | 71.69        | 75.83        | CoCoOp           | 75.98        | <b>70.43</b> | <b>73.10</b> | CoCoOp         | 97.96        | 93.81        | 95.84        |
| Ours                         | <b>83.96</b> | <b>74.53</b> | <b>78.72</b> | Ours             | 75.95        | 69.79        | 72.74        | Ours           | <b>98.04</b> | <b>94.51</b> | <b>96.24</b> |
| (d) OxfordPets               |              |              |              | (e) StanfordCars |              |              |              | (f) Flowers102 |              |              |              |
|                              | base         | new          | H            |                  | base         | new          | H            |                | base         | new          | H            |
| CLIP                         | 91.17        | 97.26        | 94.12        | CLIP             | 63.37        | <b>74.89</b> | 68.65        | CLIP           | 72.08        | <b>77.80</b> | 74.83        |
| CoOp                         | 93.67        | 95.29        | 94.47        | CoOp             | 78.12        | 60.40        | 68.13        | CoOp           | 97.60        | 59.67        | 74.06        |
| CoCoOp                       | <b>95.20</b> | <b>97.69</b> | <b>96.43</b> | CoCoOp           | 70.49        | 73.59        | 72.01        | CoCoOp         | 94.87        | 71.75        | 81.71        |
| Ours                         | 94.10        | 97.15        | 95.60        | Ours             | <b>78.71</b> | 66.92        | <b>72.34</b> | Ours           | <b>97.78</b> | 72.46        | <b>83.24</b> |
| (g) Food101                  |              |              |              | (h) FGVCAircraft |              |              |              | (i) SUN397     |              |              |              |
|                              | base         | new          | H            |                  | base         | new          | H            |                | base         | new          | H            |
| CLIP                         | 90.10        | 91.22        | 90.66        | CLIP             | 27.19        | <b>36.29</b> | 31.09        | CLIP           | 69.36        | 75.35        | 72.23        |
| CoOp                         | 88.33        | 82.26        | 85.19        | CoOp             | 40.44        | 22.30        | 28.75        | CoOp           | 80.60        | 65.89        | 72.51        |
| CoCoOp                       | <b>90.70</b> | <b>91.29</b> | <b>90.99</b> | CoCoOp           | 33.41        | 23.71        | 27.74        | CoCoOp         | 79.74        | <b>76.86</b> | 78.27        |
| Ours                         | 90.63        | 91.21        | 90.92        | Ours             | <b>45.88</b> | 34.09        | <b>39.12</b> | Ours           | <b>81.95</b> | 75.62        | <b>78.65</b> |
| (j) DTD                      |              |              |              | (k) EuroSAT      |              |              |              | (l) UCF101     |              |              |              |
|                              | base         | new          | H            |                  | base         | new          | H            |                | base         | new          | H            |
| CLIP                         | 53.24        | <b>59.90</b> | 56.37        | CLIP             | 56.48        | 64.05        | 60.03        | CLIP           | 70.53        | 77.50        | 73.85        |
| CoOp                         | 79.44        | 41.18        | 54.24        | CoOp             | 92.19        | 54.74        | 68.69        | CoOp           | 84.69        | 56.05        | 67.46        |
| CoCoOp                       | 77.01        | 56.00        | 64.85        | CoCoOp           | 87.49        | 60.04        | 71.21        | CoCoOp         | 82.33        | 73.45        | 77.64        |
| Ours                         | <b>80.63</b> | 59.82        | <b>68.69</b> | Ours             | <b>93.28</b> | <b>79.21</b> | <b>85.67</b> | Ours           | <b>86.63</b> | <b>79.09</b> | <b>82.69</b> |

Table 8: **Base-to-new generalization.** Comparison of CLIP, CoOp, CoCoOp, and our method. CoOp and CoCoOp are training-required methods, while our method is a training-free method. base and new denotes the average accuracy of base and new classes, and H denotes their harmonic mean.

Table 9: **Robustness of different architectures on 11 datasets.** The models are trained under the 16-shot setting with different visual architectures of CLIP. **Bold** denotes the highest results.

| Method            | Pets         | Flowers      | FGVC         | DTD          | EuroSAT      | Cars         | Food         | SUN          | Cal          | UCF          | IN           | Avg.         |
|-------------------|--------------|--------------|--------------|--------------|--------------|--------------|--------------|--------------|--------------|--------------|--------------|--------------|
| <b>ResNet-50</b>  |              |              |              |              |              |              |              |              |              |              |              |              |
| zero-shot CLIP    | 85.77        | 66.14        | 17.28        | 42.32        | 37.56        | 55.61        | 77.31        | 58.52        | 86.29        | 61.46        | 58.18        | 58.77        |
| CoOp              | 87.01        | 94.51        | 31.26        | 63.58        | 83.53        | 73.36        | 74.67        | 69.26        | 91.83        | 75.71        | 62.95        | 73.42        |
| Tip-Adapter       | 88.14        | 89.89        | 29.76        | 60.93        | 70.54        | 66.77        | 77.83        | 66.85        | 90.18        | 70.58        | 62.01        | 70.32        |
| Ours              | <b>88.81</b> | <b>95.72</b> | <b>40.61</b> | <b>66.51</b> | <b>86.12</b> | <b>75.12</b> | <b>79.05</b> | <b>70.70</b> | <b>92.55</b> | <b>77.53</b> | <b>63.82</b> | <b>76.05</b> |
| <b>ResNet-101</b> |              |              |              |              |              |              |              |              |              |              |              |              |
| zero-shot CLIP    | 86.75        | 64.03        | 18.42        | 38.59        | 32.59        | 66.23        | 80.53        | 58.96        | 89.78        | 60.96        | 61.62        | 59.86        |
| CoOp              | 88.57        | 95.19        | 34.76        | 65.47        | 83.54        | 79.74        | 79.08        | 71.19        | 93.42        | 77.95        | <b>66.60</b> | 75.96        |
| Tip-Adapter       | 87.23        | 90.77        | 31.51        | 62.37        | 66.45        | 72.96        | 81.31        | 67.96        | 93.01        | 73.53        | 64.41        | 71.96        |
| Ours              | <b>91.43</b> | <b>96.17</b> | <b>42.58</b> | <b>68.62</b> | <b>86.32</b> | <b>79.99</b> | <b>82.15</b> | <b>72.07</b> | <b>93.63</b> | <b>79.31</b> | 66.33        | <b>78.06</b> |
| <b>ViT-B/32</b>   |              |              |              |              |              |              |              |              |              |              |              |              |
| zero-shot CLIP    | 87.49        | 66.95        | 19.23        | 43.97        | 45.19        | 60.55        | 80.50        | 61.91        | 90.87        | 62.01        | 62.05        | 61.88        |
| CoOp              | 88.68        | 94.97        | 33.22        | 65.37        | 83.43        | 76.08        | 78.45        | 72.38        | <b>94.62</b> | 78.66        | 66.85        | 75.70        |
| Tip-Adapter       | 88.34        | 91.61        | 30.92        | 61.90        | 69.53        | 69.59        | 80.94        | 70.27        | 93.85        | 73.74        | 65.41        | 72.37        |
| Ours              | <b>91.21</b> | <b>96.16</b> | <b>41.74</b> | <b>67.63</b> | <b>87.30</b> | <b>77.55</b> | <b>81.84</b> | <b>73.60</b> | 94.42        | <b>80.17</b> | <b>67.00</b> | <b>78.06</b> |
| <b>ViT-B/16</b>   |              |              |              |              |              |              |              |              |              |              |              |              |
| zero-shot CLIP    | 89.21        | 71.34        | 24.72        | 44.39        | 47.60        | 65.32        | 86.06        | 62.50        | 92.94        | 66.75        | 66.73        | 65.23        |
| CoOp              | 92.53        | 96.47        | 42.91        | 68.50        | 80.87        | <b>83.09</b> | 87.21        | 75.29        | 95.77        | 82.24        | 71.92        | 79.71        |
| Tip-Adapter       | 91.54        | 94.41        | 39.48        | 65.68        | 76.58        | 75.44        | 86.47        | 71.85        | 95.10        | 77.94        | 70.46        | 76.81        |
| Ours              | <b>93.73</b> | <b>97.92</b> | <b>50.33</b> | <b>71.26</b> | <b>89.19</b> | 82.63        | <b>87.27</b> | <b>75.87</b> | <b>95.79</b> | <b>84.09</b> | <b>72.24</b> | <b>81.85</b> |

2019), ImageNet-Sketch (Wang et al., 2019), ImageNet-A (Hendrycks et al., 2021b), ImageNet-R (Hendrycks et al., 2021a), ImageNet-LT (Liu et al., 2019), and Places-LT (Zhou et al., 2017).

Table 10: Detailed statistics of datasets used in experiments.

| Dataset                | # Classes | # Training | # Test | Task                              |
|------------------------|-----------|------------|--------|-----------------------------------|
| <b>OxfordPets</b>      | 37        | 2,944      | 3,669  | fine-grained pets recognition     |
| <b>Flowers102</b>      | 102       | 4,093      | 2,463  | fine-grained flowers recognition  |
| <b>FGVCAircraft</b>    | 100       | 3,334      | 3,333  | fine-grained aircraft recognition |
| <b>DTD</b>             | 47        | 2,820      | 1,692  | Textural recognition              |
| <b>EuroSAT</b>         | 10        | 13,500     | 8,100  | Satellite image recognition       |
| <b>StanfordCars</b>    | 196       | 6,509      | 8,041  | Fine-grained car recognition      |
| <b>Food101</b>         | 101       | 50,500     | 30,300 | Fine-grained food recognition     |
| <b>Sun397</b>          | 397       | 15,880     | 19,850 | Scene recognition                 |
| <b>Caltech101</b>      | 100       | 4,128      | 2,465  | Object recognition                |
| <b>UCF101</b>          | 101       | 7,639      | 3,783  | Action recognition                |
| <b>ImageNet</b>        | 1,000     | 1.28M      | 50,000 | Object recognition                |
| <b>ImageNetV2</b>      | 1,000     | -          | 10,000 | Robustness of collocation         |
| <b>ImageNet-Sketch</b> | 1,000     | -          | 50,889 | Robustness of sketch domain       |
| <b>ImageNet-A</b>      | 200       | -          | 7,500  | Robustness of adversarial         |
| <b>ImageNet-R</b>      | 200       | -          | 30,000 | Robustness of rendition styles    |
| <b>ImageNet-LT</b>     | 1,000     | 115,846    | 50,000 | long-tail object recognition      |
| <b>Places-LT</b>       | 365       | 62,500     | 7300   | long-tail place recognition       |

## B.2 PROMPT TEMPLATES FOR EACH DATASET

For the zero-shot classifier, we employ handcrafted prompts to generate the classifier weight, as proposed in CLIP (Radford et al., 2021). By default, we utilize the prompt template “a photo of {class}.” for class labels, where {class} represents the name of the classes. However, for fine-grained classification datasets such as FGVCAircraft (Maji et al., 2013), we incorporate the name of the superclass or a description into the template. The prompt templates for each dataset are shown as follows.

## B.3 PSEUDOCODE

Table 11: Prompt templates for each class.

| Dataset                                 | Prompt template                                                                                                                                                                      |
|-----------------------------------------|--------------------------------------------------------------------------------------------------------------------------------------------------------------------------------------|
| Caltech101 (Li et al., 2004)            | “a photo of a {class}.”                                                                                                                                                              |
| OxfordPets (Parkhi et al., 2012)        | “a photo of a {class}, a type of pet.”                                                                                                                                               |
| StanfordCars (Krause et al., 2013)      | “a photo of a {class}.”                                                                                                                                                              |
| Flowers102 (Nilsback & Zisserman, 2008) | “a photo of a {class}, a type of flower.”                                                                                                                                            |
| Food101 (Bossard et al., 2014)          | “a photo of {class}, a type of food.”                                                                                                                                                |
| FGVCAircraft (Maji et al., 2013)        | “a photo of a {class}, a type of aircraft.”                                                                                                                                          |
| SUN397 (Xiao et al., 2010)              | “a photo of a {class}.”                                                                                                                                                              |
| DTD (Cimpoi et al., 2014)               | “{class} texture.”                                                                                                                                                                   |
| EuroSAT (Helber et al., 2019)           | “a centered satellite photo of {class}.”                                                                                                                                             |
| UCF101 (Soomro et al., 2012)            | “a photo of a person doing {class}.”                                                                                                                                                 |
| ImageNet (Deng et al., 2009)            | “a bad photo of the {class}.”<br>“a origami {class}.”<br>“a photo of the large {class}.”<br>“a {class} in a video game.”<br>“art of the {class}.”<br>“a photo of the small {class}.” |
| ImageNet-LT (Liu et al., 2019)          | “a photo of a {class}.”                                                                                                                                                              |
| Places-LT (Zhou et al., 2017)           | “a photo of a {class}.”                                                                                                                                                              |

**Algorithm 1** Pytorch-like pseudocode for our method.

---

```

1  # Input:
2  # - X: (N, D) visual features from CLIP visual encoder.
3  # - Y: (N, ) ground-truth label for the features.
4  # - X_test: (M, D) test visual features from CLIP visual encoder.
5  # - Y_test: (M, ) ground-truth label for test features.
6  # - W_c: (K, D) zero-shot classifier generated by prompting.
7  # Output:
8  # - acc: test accuracy.
9
10 def hard_to_beat(X, Y, X_test, Y_test, W_c):
11     # 1. Compute mean vectors for each class.
12     mus = []
13     for i in range(K):
14         idx = torch.where(Y == i)
15         mus.append(X[idx].mean(dim=0))
16     mus = torch.cat(mus)
17
18     # 2. Estimate the precision matrix using Equation (4).
19     # centered features
20     centered_X = torch.cat([(X[torch.where(Y == i)] - mus[i]) for i in range(K)])
21     cov = torch.cov(centered_X)
22     # compute the precision matrix (inverse covariance)
23     inv_cov = D * torch.inv((N - 1) * cov + trace(cov) * eye(D))
24
25     # 3. Compute weight and bias using Equation (3).
26     W = mus @ inv_cov
27     b = log(1 / K) - 0.5 * einsum('nd, dc, nc -> n', mus, inv_cov, mus)
28
29     # 4. Search the hyperparameter using the validation set.
30     alpha = search_hyperparam(W_c, W, b)
31
32     # 5. Test.
33     test_logits = X_test @ W_c.T + alpha * (X_test @ W.T + b)
34     acc = compute_acc(test_logits, Y_test)
35 return acc

```

---
