# Supplementary material
Source: ML conference proceedings conference paper supplement (https://openreview.net/forum?id=Js5PJPHDyY)

**Average over 11 datasets**

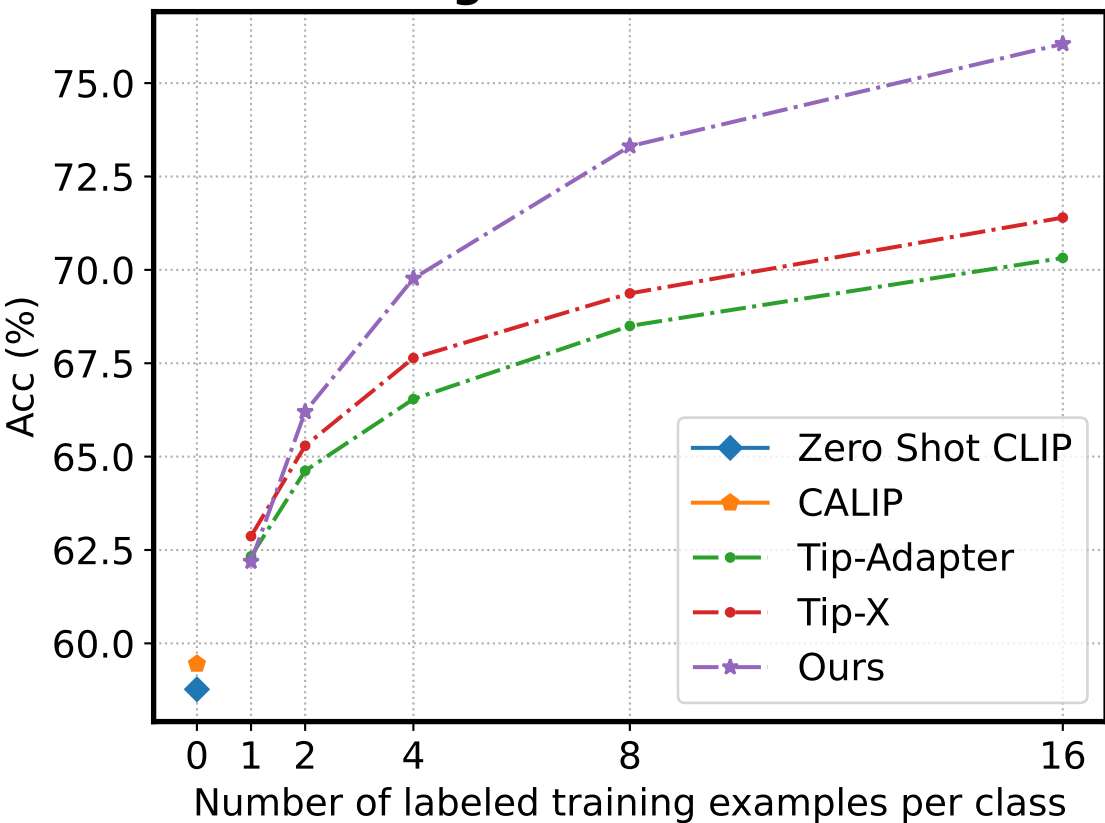

Supplement: supplementary_material [file attachment]

# Food101

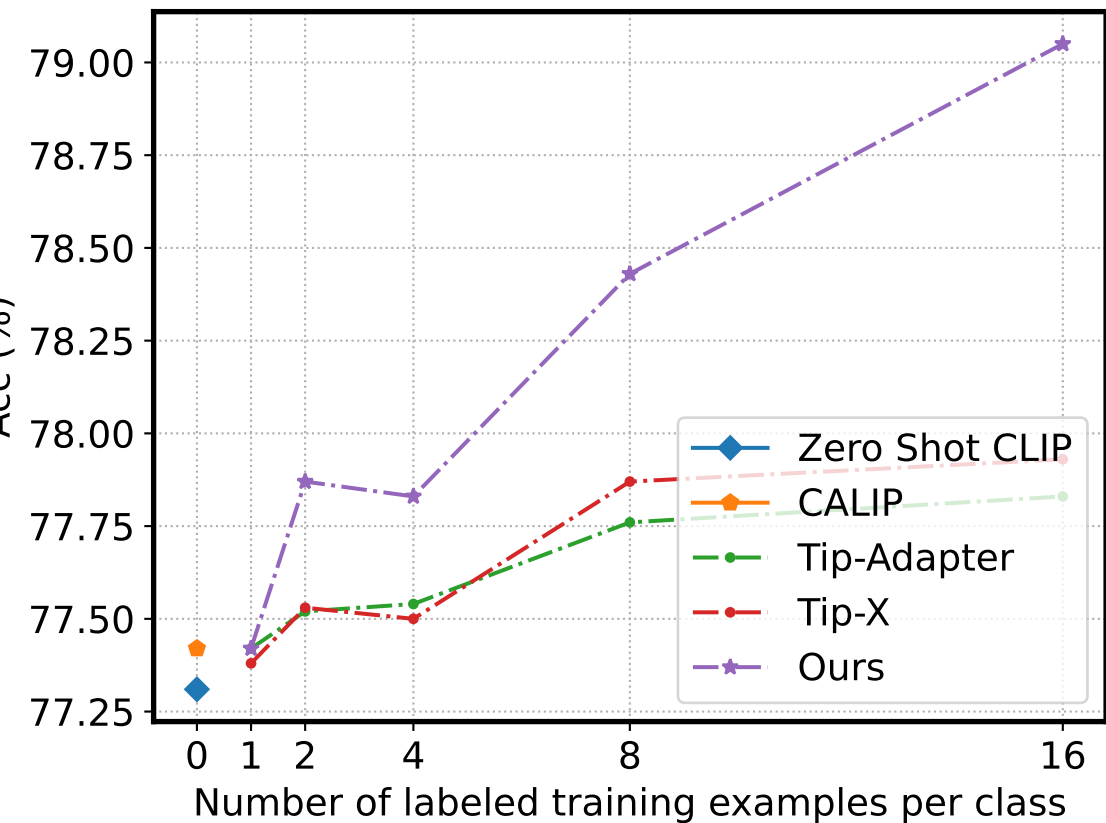

Supplement: supplementary_material [file attachment]

# Flowers102

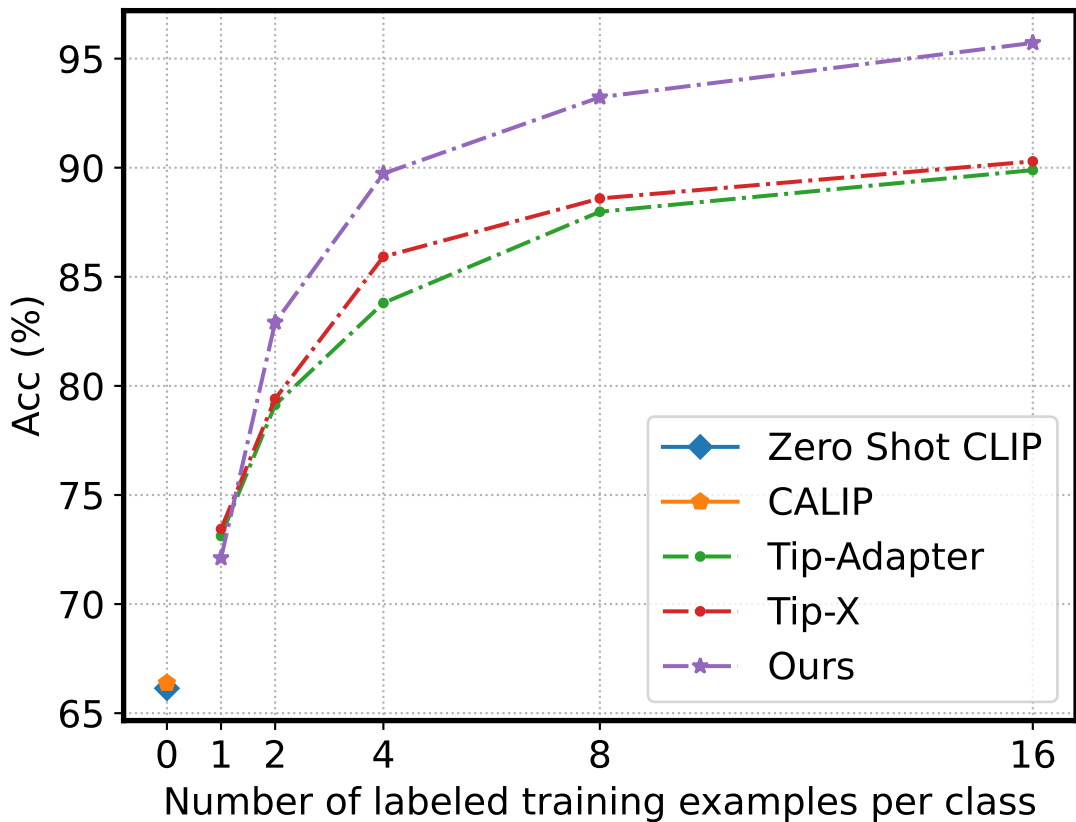

Supplement: supplementary_material [file attachment]

# ImageNet

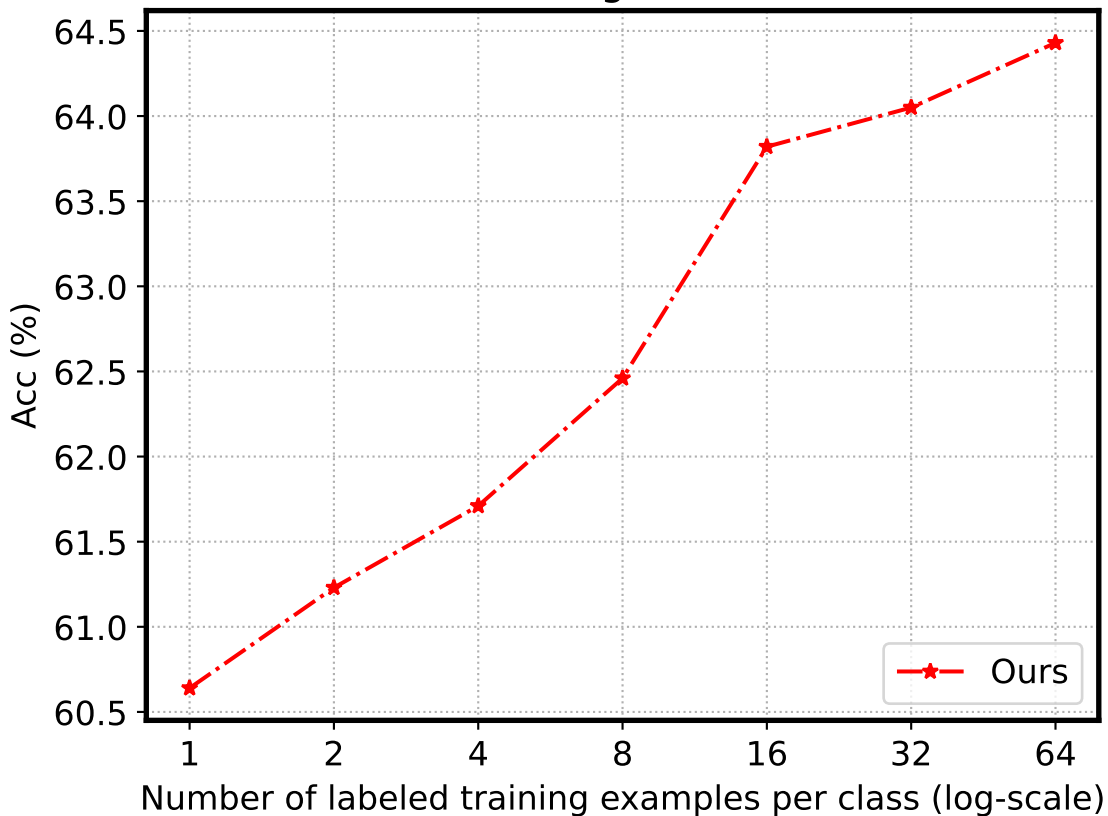

Supplement: supplementary_material [file attachment]

# UCF101

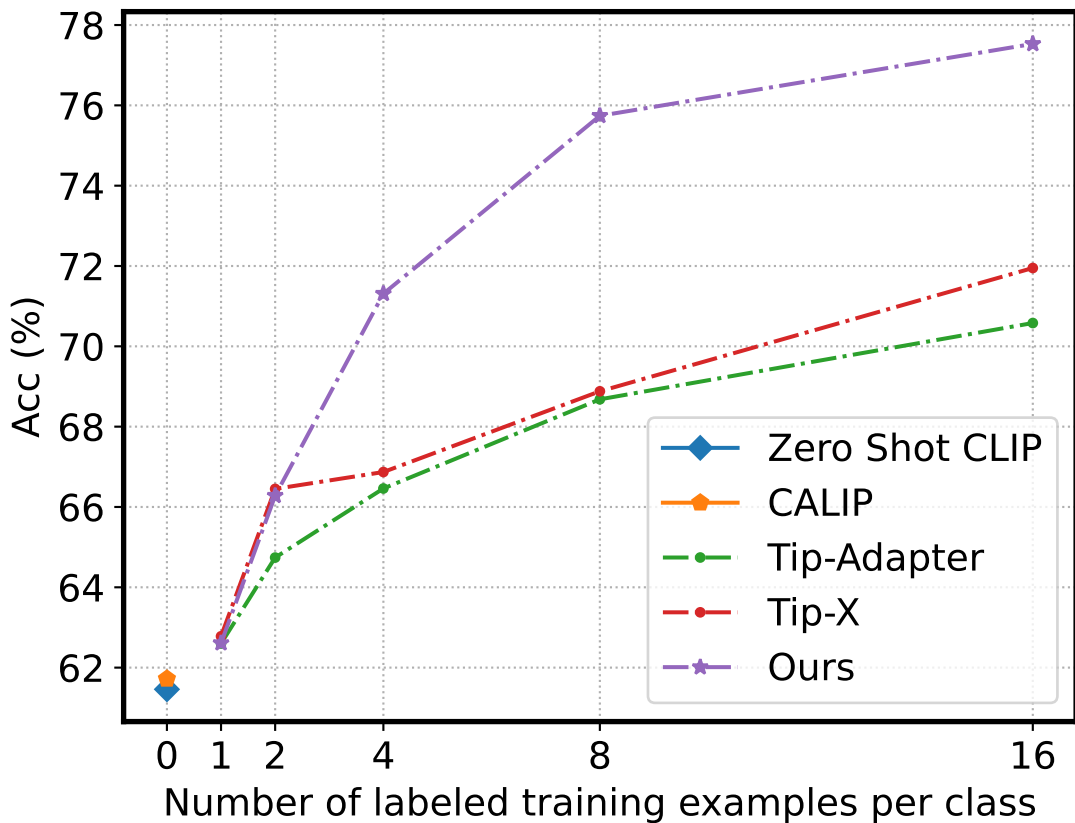

Supplement: supplementary_material [file attachment]

# StanfordCars

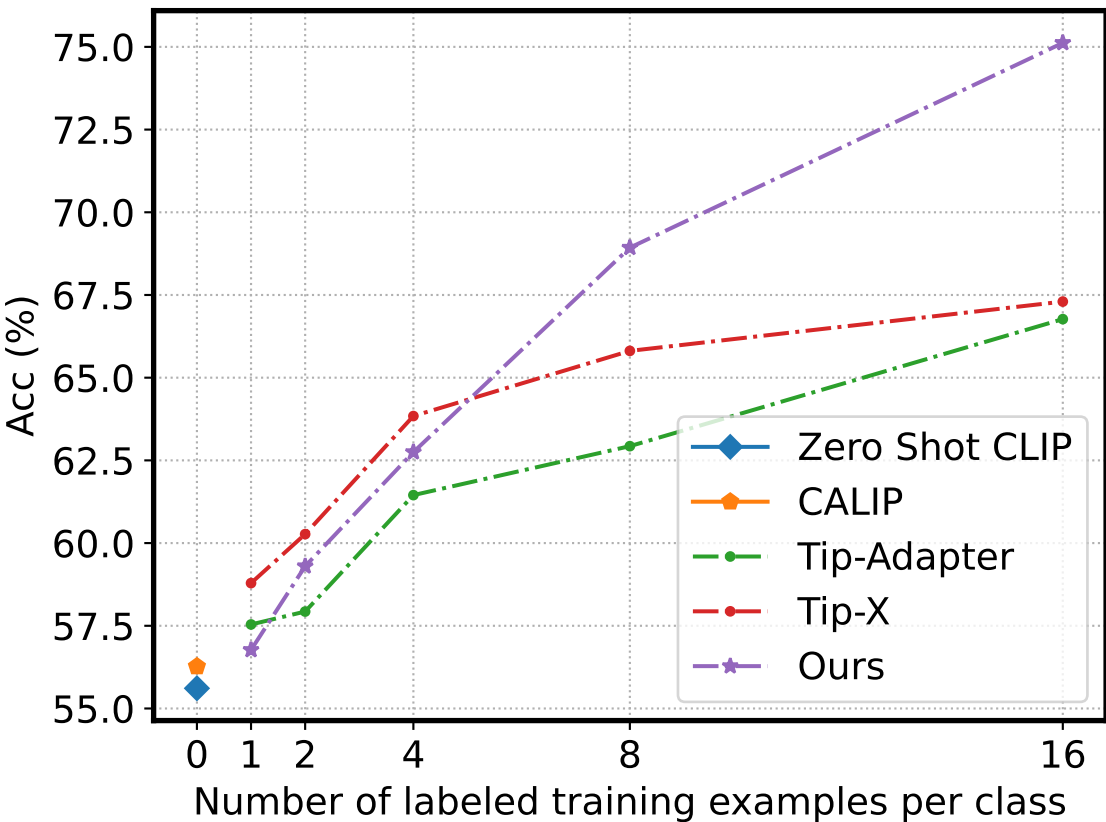

Supplement: supplementary_material [file attachment]

# ImageNet

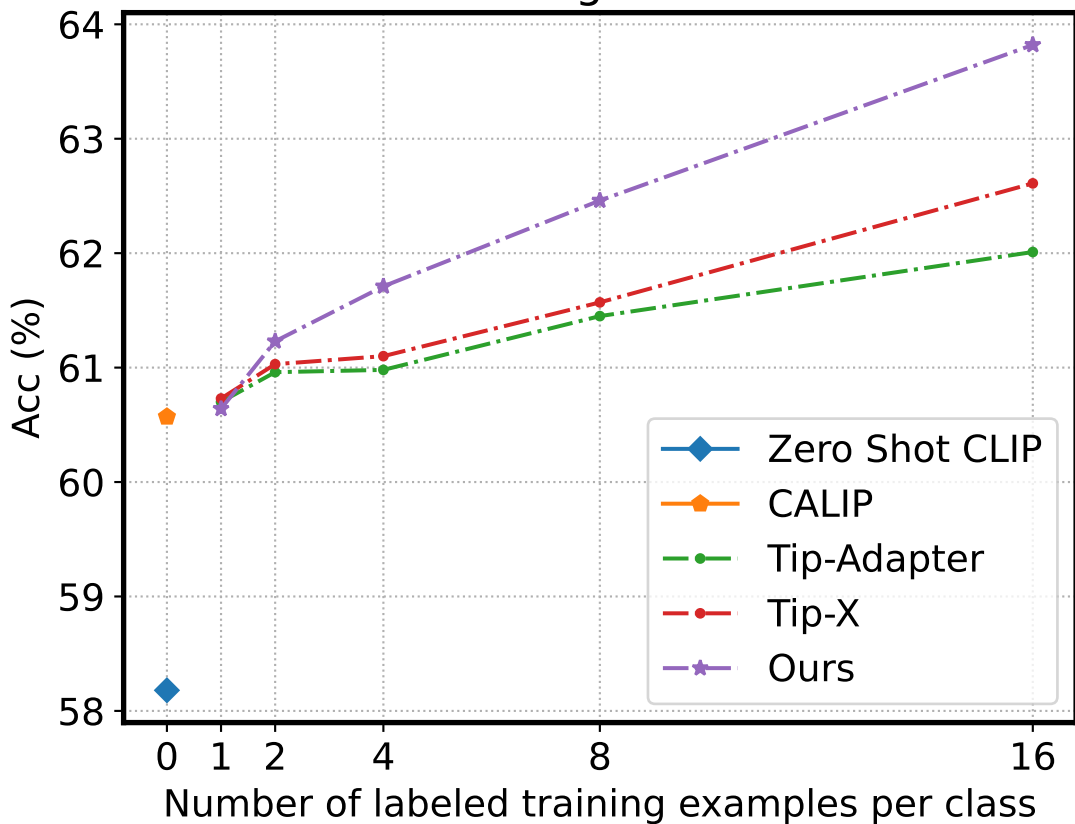

Supplement: supplementary_material [file attachment]

# FGVCAircraft

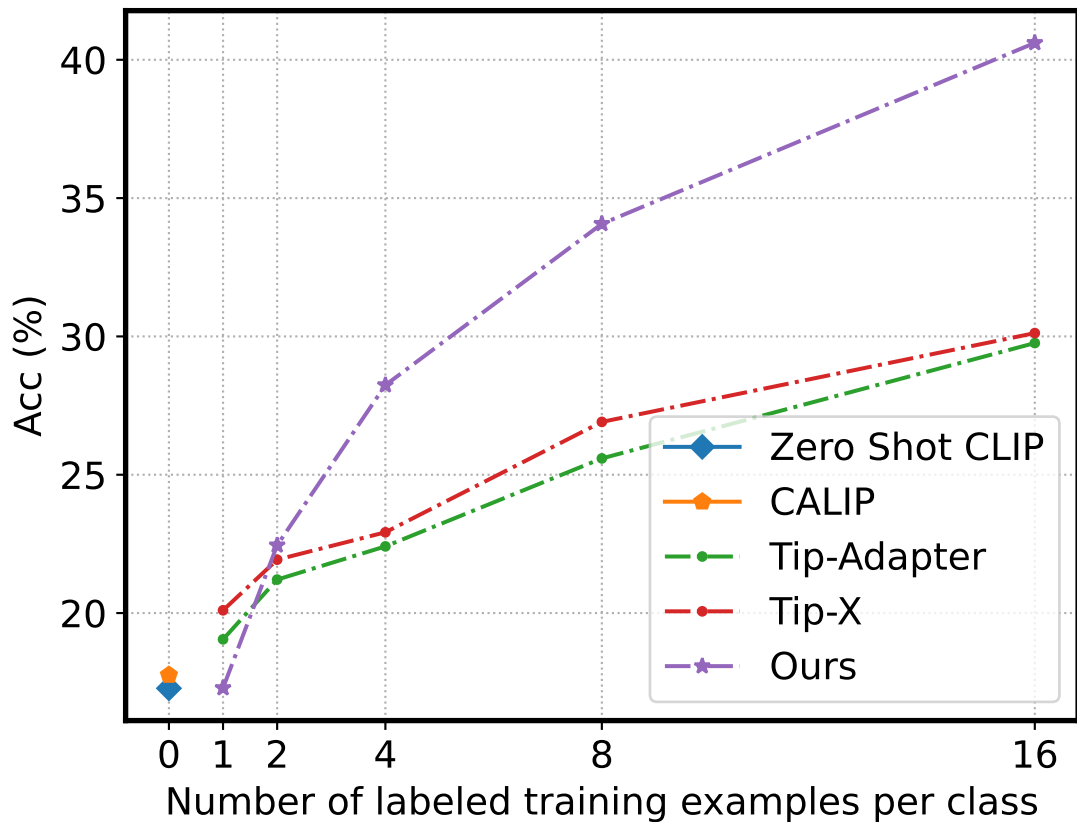

Supplement: supplementary_material [file attachment]

# Caltech101

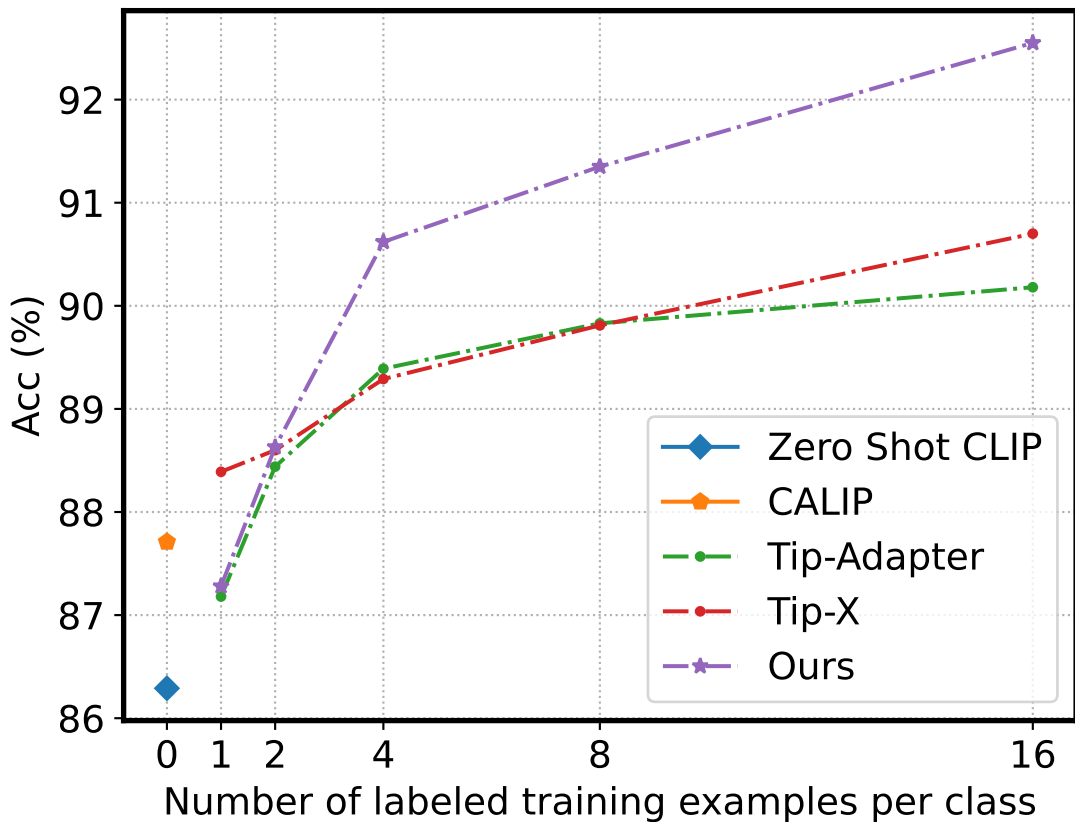

Supplement: supplementary_material [file attachment]

## DTD

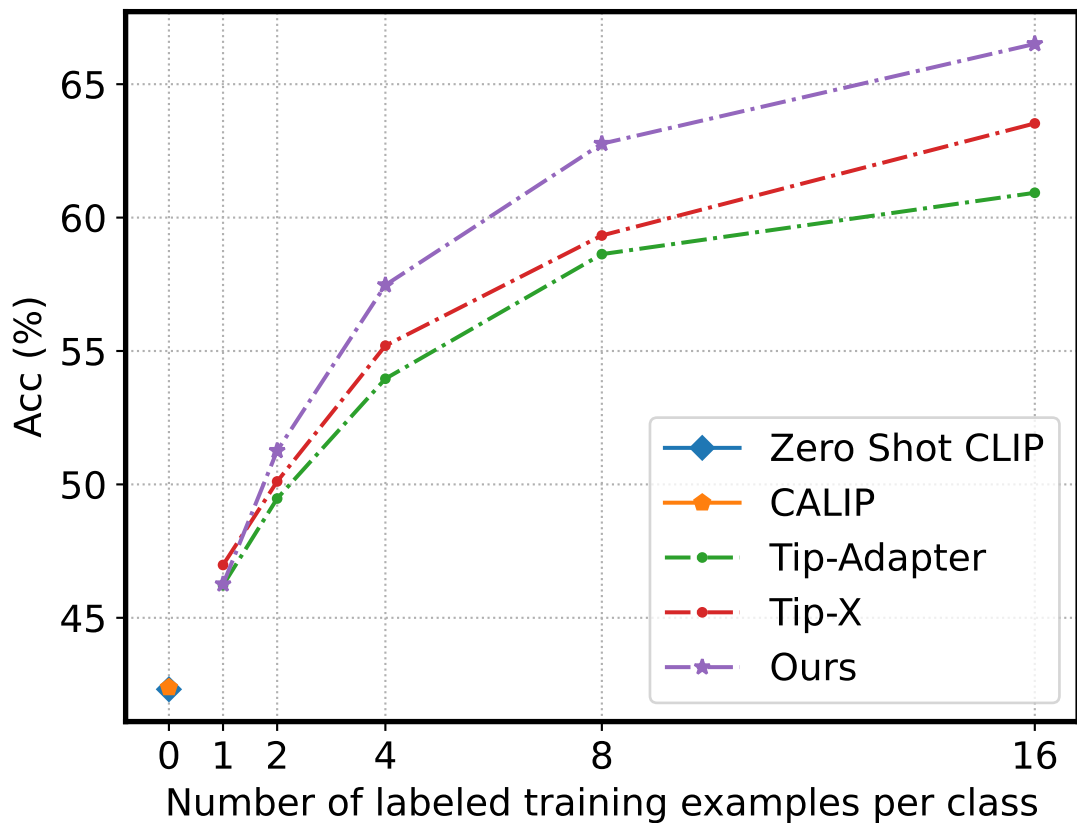

Supplement: supplementary_material [file attachment]

# SUN397

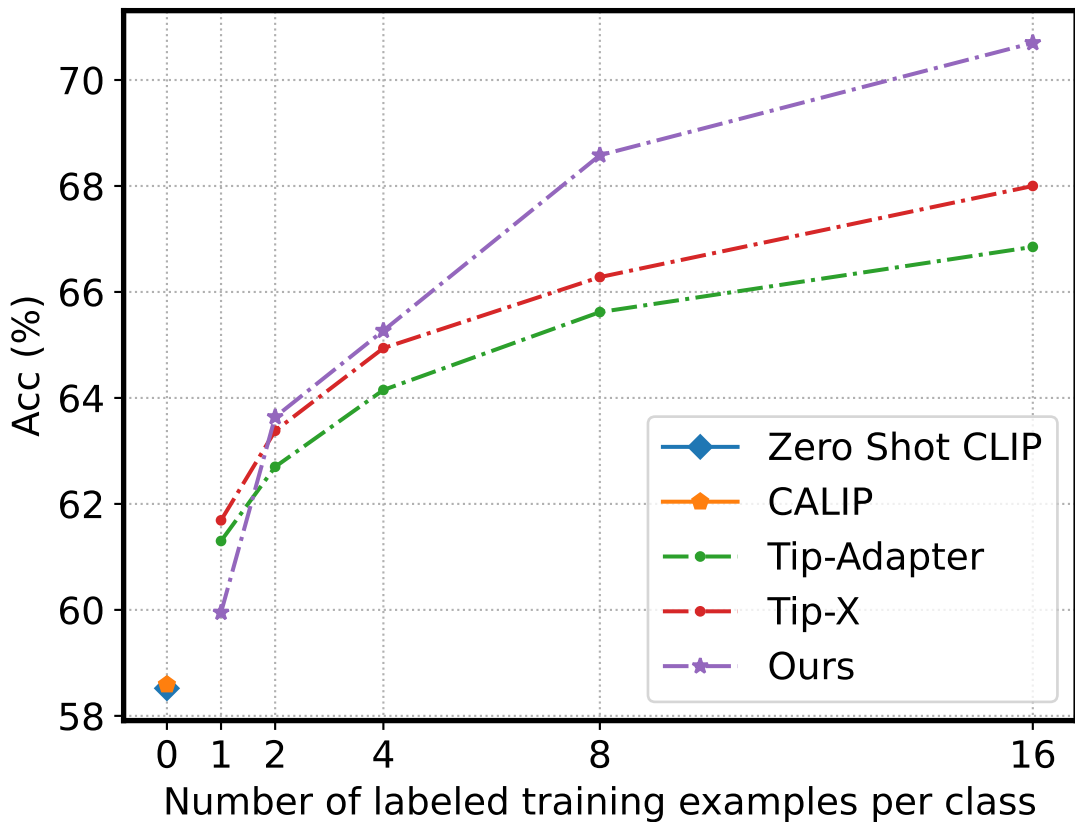

Supplement: supplementary_material [file attachment]

# OxfordPets

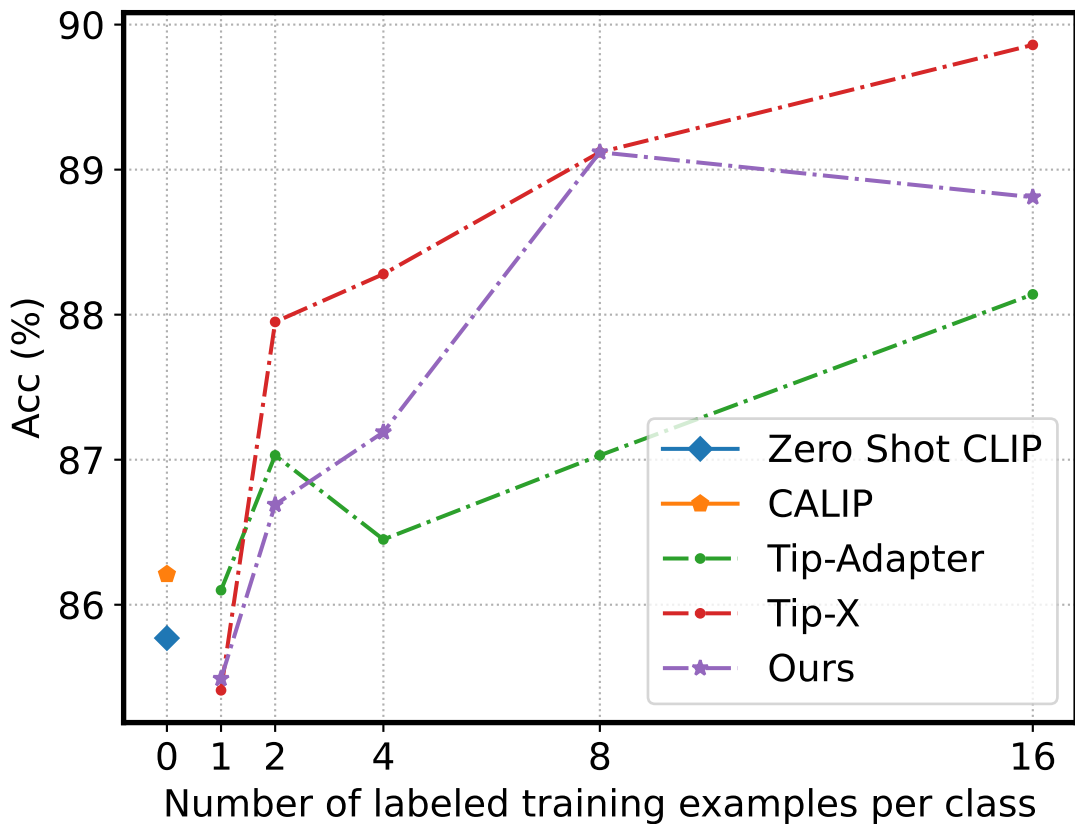

Supplement: supplementary_material [file attachment]

# Average over 11 datasets

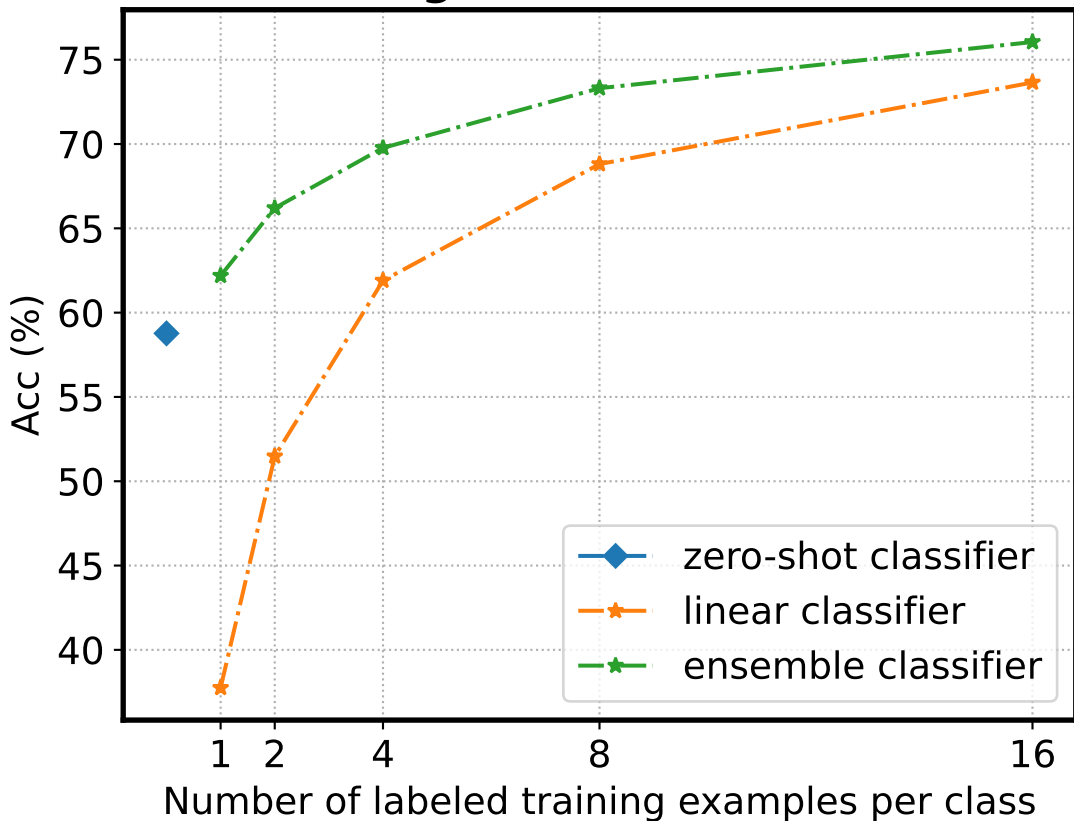

Supplement: supplementary_material [file attachment]

# EuroSAT

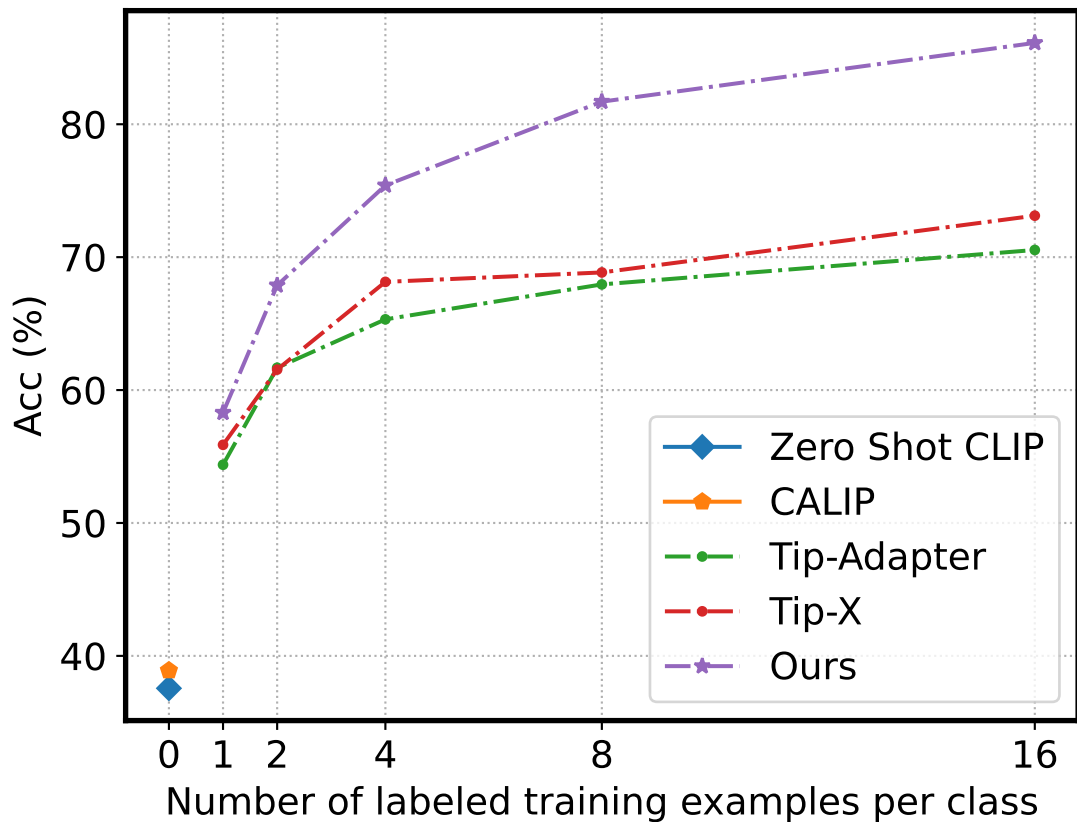

Supplement: supplementary_material [file attachment]
